# Supplementary material
Source: MDPI journal article supplement (https://www.mdpi.com/2073-4433/10/4/176)
Supplement: s1 [file s1]

Supplemental Information for:

## **Ambient mercury observations near a coal-fired power plant in a western U.S. urban area**

**Lynne E. Gratz<sup>1</sup>, Chris S. Eckley<sup>2</sup>, Story J. Schwantes<sup>1</sup>, and Erick Mattson<sup>3</sup>**

<sup>1</sup>Colorado College, Environmental Studies Program, Colorado Springs, CO, 80903, USA

<sup>2</sup>U.S. Environmental Protection Agency, Region 10, Seattle, WA, 98101, USA

<sup>3</sup>Colorado Department of Public Health and Environment, Air Pollution Control Division, Glendale, CO, 80246, USA

2 Tables

4 Figures

## Data Summary

**Table SI-1.** Summary statistics for 5-minute observations of TGM, SO<sub>2</sub>, CO and CO<sub>2</sub> at the measurement site from June 15 to October 20, 2016.

|                | <b>TGM</b><br>(ng m <sup>-3</sup> ) | <b>SO<sub>2</sub></b><br>(ppb) | <b>CO</b><br>(ppm) | <b>CO<sub>2</sub></b><br>(ppm) |
|----------------|-------------------------------------|--------------------------------|--------------------|--------------------------------|
| Mean           | 1.6                                 | 3.4                            | 0.30               | 419                            |
| Median         | 1.6                                 | 1.3                            | 0.24               | 416                            |
| Std. Deviation | 0.3                                 | 7.5                            | 0.18               | 22                             |
| Minimum        | 1.0                                 | 0                              | 0.01               | 380                            |
| Maximum        | 7.8                                 | 139                            | 2.87               | 622                            |
| N              | 35963                               | 34355                          | 32026              | 28858                          |

**Table SI-2.** Pearson correlation coefficients for hourly-averaged continuous 5-minute measurements. Values in bold are statistically significant at  $p < 0.01$ , with the exception of the CO-temperature relationship which is significant at  $p < 0.05$ ; all non-bold values are not significant at  $p < 0.05$ .

|                       | <b>TGM</b> | <b>SO<sub>2</sub></b> | <b>CO</b>   | <b>CO<sub>2</sub></b> | <b>Temp</b>  | <b>RH</b>    | <b>WS</b>    |
|-----------------------|------------|-----------------------|-------------|-----------------------|--------------|--------------|--------------|
| <b>TGM</b>            | 1          | <b>-0.06</b>          | <b>0.16</b> | <b>0.62</b>           | <b>-0.13</b> | <b>0.43</b>  | <b>-0.40</b> |
| <b>SO<sub>2</sub></b> | --         | 1                     | 0.00        | <b>0.08</b>           | <b>0.28</b>  | <b>-0.11</b> | <b>0.36</b>  |
| <b>CO</b>             | --         | --                    | 1           | <b>0.44</b>           | <b>-0.05</b> | -0.03        | <b>-0.22</b> |
| <b>CO<sub>2</sub></b> | --         | --                    | --          | 1                     | <b>-0.11</b> | <b>0.21</b>  | <b>-0.31</b> |
| <b>Temp</b>           | --         | --                    | --          | --                    | 1            | <b>-0.64</b> | <b>0.38</b>  |
| <b>RH</b>             | --         | --                    | --          | --                    | --           | 1            | <b>-0.36</b> |
| <b>WS</b>             | --         | --                    | --          | --                    | --           | --           | 1            |

## TGM outliers

On four occasions during the second half of the sampling period we detected TGM concentrations greater than 4 ng m<sup>-3</sup> that are major statistical outliers in the broader dataset (Figure 2). These four periods are summarized in Table SI-2 with regards to the observed chemical and meteorological patterns. Overall we are unable to identify specific source(s) for each enhancement (in part due to missing ancillary chemical data during two of the four periods), nor can we rule out the possibility of sampling artifacts. The patterns observed do not appear consistent with the broader findings of the larger dataset described in the manuscript. However, we provide graphical depictions below for the four periods (Figures SI-1 – SI-4) for the sake of a complete presentation of the measurements from this study.

**Table SI-2.** Summary of observations from 20 minutes before and after each of four TGM enhancements > 4 ng m<sup>-3</sup>. Reported values are the maximum of the 5-min TGM and 1-min SO<sub>2</sub>, CO, and CO<sub>2</sub> measurements and the average value for the meteorological measurements.

| Date       | Time          | Max TGM<br>(ng m <sup>-3</sup> ) | Max SO <sub>2</sub><br>(ppb) | Max CO<br>(ppm) | Max CO <sub>2</sub><br>(ppm) | Avg WS<br>(m/s) | Avg Temp<br>(°C) | Avg RH<br>(%) |
|------------|---------------|----------------------------------|------------------------------|-----------------|------------------------------|-----------------|------------------|---------------|
| 8/31/2016  | 12:15 - 12:55 | 7.4                              | N/A                          | N/A             | 410                          | 3.0             | 22.4             | 52.0          |
| 9/5/2016   | 8:00 - 8:40   | 6.8                              | 76                           | 0.46            | 441                          | 2.0             | 20.4             | 36.1          |
| 9/27/2016  | 6:05 - 6:45   | 4.9                              | 5.4                          | 1.65            | 504                          | 0.54            | 7.48             | 61.6          |
| 10/10/2016 | 6:30 - 7:10   | 7.8                              | 5.8                          | 1.68            | N/A                          | 0.62            | 12.0             | 43.5          |

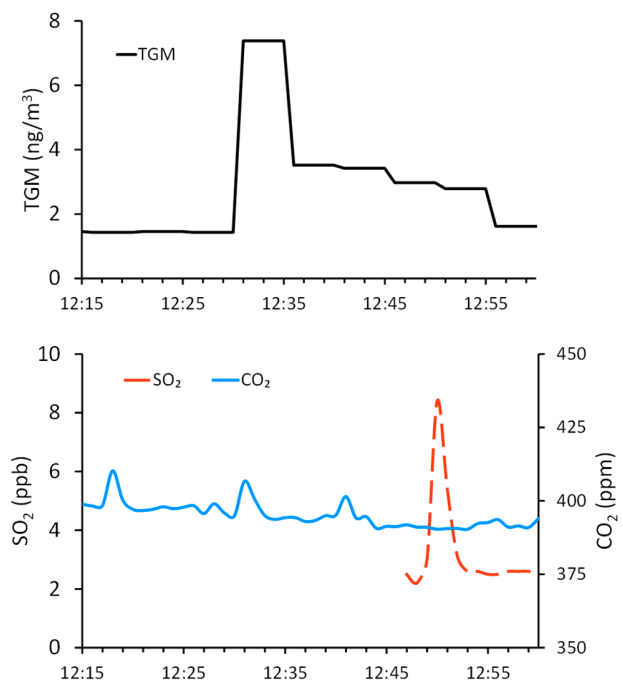

**Figure SI-1.** 5-min TGM and 1-minute  $\text{SO}_2$ ,  $\text{CO}$ , and  $\text{CO}_2$  measurements on August 31, 2016 from 12:15 MST to 13:00 MST.

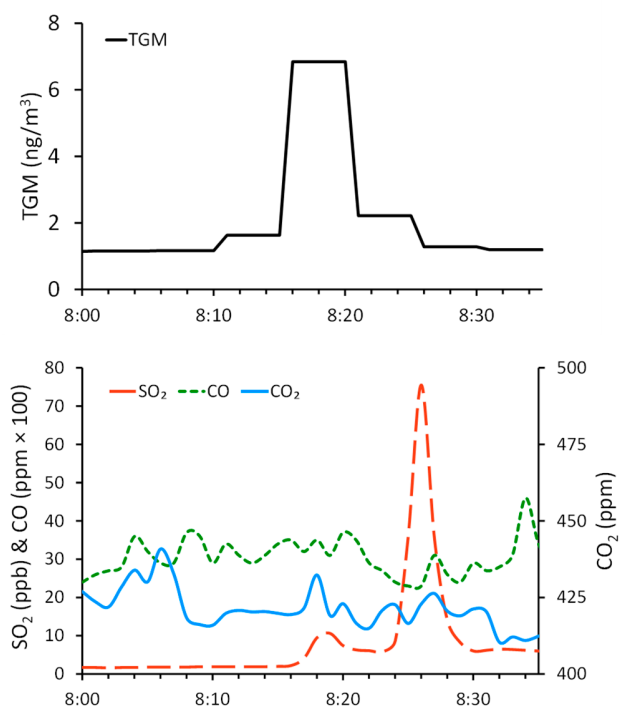

**Figure SI-2.** 5-min TGM and 1-minute  $\text{SO}_2$ ,  $\text{CO}$ , and  $\text{CO}_2$  measurements on September 5, 2016 from 8:00 MST to 8:35 MST. Note that  $\text{CO}$  values are shown as  $\text{ppm} \times 100$  to fit the range of values for  $\text{SO}_2$  on the primary vertical axis.

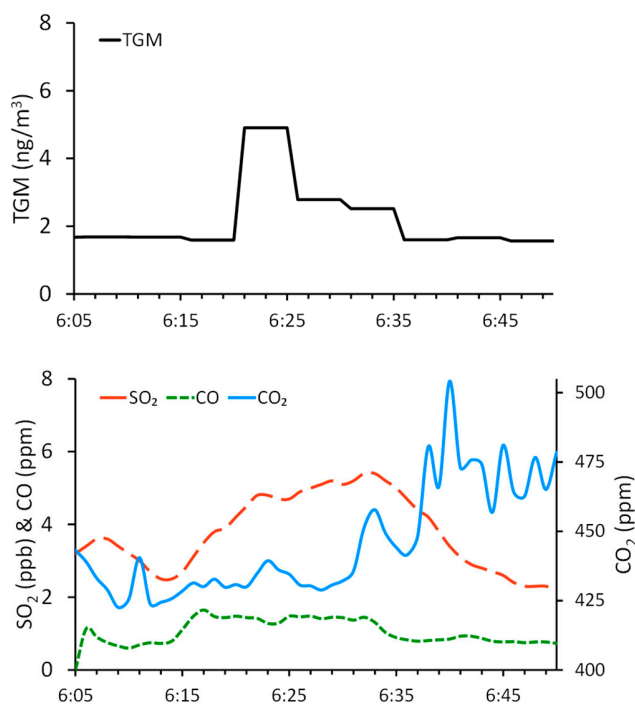

**Figure SI-3.** 5-min TGM and 1-minute  $\text{SO}_2$ , CO, and  $\text{CO}_2$  measurements on September 27, 2016 from 6:05 MST to 6:50 MST.

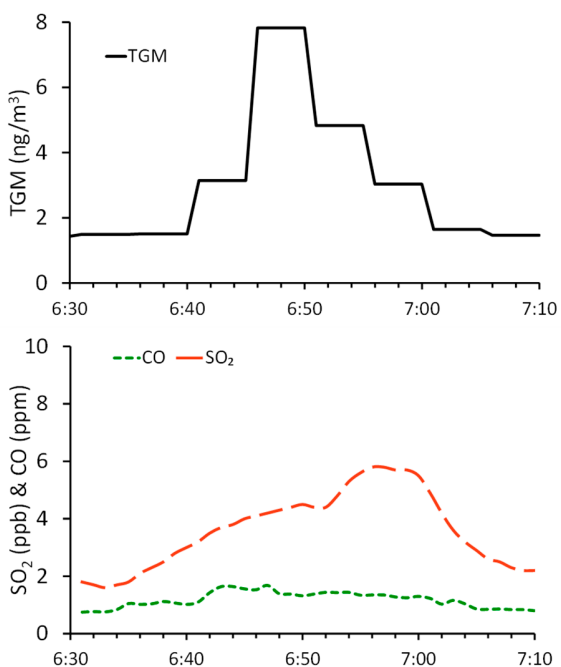

**Figure SI-4.** 5-min TGM and 1-minute  $\text{SO}_2$ , CO, and  $\text{CO}_2$  measurements on October 10, 2016 from 6:30 MST to 7:10 MST.
